# Supplementary material for: Plasma Concentrations of Lysophosphatidic Acid and Autotaxin in Abstinent Patients with Alcohol Use Disorder and Comorbid Liver Disease
Source: MDPI journal article supplement (doi:10.3390/biomedicines9091207), 2021-09-13
Supplement: s1 [file s1]

**Table S1. Logistic regression model for distinguishing patients with AUD**

| BINARY LOGISTIC REGRESSION MODEL | VARIABLE         | B      | SE    | W     | df | p-value | Exp(B) | 95% CI for Exp(B) |        |
|----------------------------------|------------------|--------|-------|-------|----|---------|--------|-------------------|--------|
|                                  |                  |        |       |       |    |         |        | Lower             | Upper  |
|                                  | LPA <sup>a</sup> | 2.418  | 0.783 | 9.525 | 1  | 0.002   | 11.221 | 2.417             | 52.105 |
|                                  | ATX <sup>a</sup> | -2.233 | 0.797 | 7.862 | 1  | 0.005   | 0.107  | 0.022             | 0.511  |
|                                  | Age              | -0.006 | 0.031 | 0.038 | 1  | 0.845   | 0.994  | 0.935             | 1.057  |
|                                  | BMI              | -0.133 | 0.070 | 3.600 | 1  | 0.058   | 0.875  | 0.763             | 1.004  |
|                                  | Sex              | 0.315  | 0.521 | 0.366 | 1  | 0.545   | 1.370  | 0.494             | 3.803  |
|                                  | Constant         | 1.123  | 1.778 | 0.075 | 1  | 0.784   | 3.074  | -                 | -      |

(<sup>a</sup>) Log<sub>10</sub> values

**Abbreviations:** ATX=Autotaxin; B=Coefficient; BMI=Body mass index; CI=Confidence interval; df=Degrees of freedom; LPA=Total lysophosphatidic acid; SE=Standard error; W=Wald test
