# Supplementary material for: Plasma Concentrations of Lysophosphatidic Acid and Autotaxin in Abstinent Patients with Alcohol Use Disorder and Comorbid Liver Disease
Source: MDPI journal article supplement (doi:10.3390/biomedicines9091207), 2021-09-13
Supplement: s1 [file s1]

**Table S2. Logistic regression model for distinguishing patients with AUD and liver disease**

|                                  | VARIABLE                          | B       | SE    | W     | df | p-value | Exp(B)     | 95% CI for Exp(B) |         |
|----------------------------------|-----------------------------------|---------|-------|-------|----|---------|------------|-------------------|---------|
|                                  |                                   |         |       |       |    |         |            | Lower             | Upper   |
| BINARY LOGISTIC REGRESSION MODEL | LPA <sup>a</sup>                  | -2.540  | 1.620 | 2.459 | 1  | 0.117   | 0.079      | 0.003             | 1.887   |
|                                  | ATX <sup>a</sup>                  | 2.178   | 1.659 | 1.724 | 1  | 0.189   | 8.832      | 0.342             | 228.242 |
|                                  | Problematic alcohol use           | 0.045   | 0.041 | 1.193 | 1  | 0.275   | 1.046      | 0.965             | 1.134   |
|                                  | Last period of alcohol abstinence | -0.938  | 0.874 | 1.152 | 1  | 0.283   | 0.391      | 0.071             | 2.171   |
|                                  | DSM criteria for AUD <sup>b</sup> |         |       | 6.046 | 9  | 0.735   |            |                   |         |
|                                  | DSM criteria for AUD (1)          | 41.941  | 42679 | 0.000 | 1  | 0.999   | 1.64E+18   | -                 | -       |
|                                  | DSM criteria for AUD (2)          | -1.083  | 42679 | 0.000 | 1  | 1.000   | 0.339      | -                 | -       |
|                                  | DSM criteria for AUD (3)          | 42.131  | 26138 | 0.000 | 1  | 0.999   | 1.98E+18   | -                 | -       |
|                                  | DSM criteria for AUD (4)          | 19.899  | 14353 | 0.000 | 1  | 0.999   | 438561996  | -                 | -       |
|                                  | DSM criteria for AUD (5)          | 22.320  | 14353 | 0.000 | 1  | 0.999   | 4937405080 | -                 | -       |
|                                  | DSM criteria for AUD (6)          | 19.413  | 14353 | 0.000 | 1  | 0.999   | 269704268  | -                 | -       |
|                                  | DSM criteria for AUD (7)          | -0.292  | 19346 | 0.000 | 1  | 1.000   | 0.746      | -                 | -       |
|                                  | DSM criteria for AUD (8)          | 21.623  | 14353 | 0.000 | 1  | 0.999   | 2460003041 | -                 | -       |
|                                  | DSM criteria for AUD (9)          | 21.666  | 14353 | 0.000 | 1  | 0.999   | 2566477713 | -                 | -       |
|                                  | Constant                          | -17.610 | 14353 | 0.000 | 1  | 0.999   | 0.000      | -                 | -       |

(<sup>a</sup>) Log<sub>10</sub> values

(<sup>b</sup>) Categorical variable

**Abbreviations:** ATX=Autotaxin; AUD=Alcohol use disorder; B=Coefficient; CI=Confidence interval; df=Degrees of freedom; DSM=Diagnostic and Statistical Manual of Mental Disorders; LPA=Total lysophosphatidic acid; SE=Standard error; W=Wald test
