# Supplementary material for: Plasma Concentrations of Lysophosphatidic Acid and Autotaxin in Abstinent Patients with Alcohol Use Disorder and Comorbid Liver Disease
Source: Biomedicines. 2021 Sep 13;9(9):1207. doi: 10.3390/biomedicines9091207 (PMC8469650; doi:10.3390/biomedicines9091207)
Supplement: Supplementary file 1 [file biomedicines-09-01207-s001.zip]

Archive with 4 entries (4 files):
- figure legends (2).pdf
- Figure S1 (2).pptx
- Table S1 (2).pdf
- Table S2 (2).pdf
